# Supplementary material for: Key genes as stress indicators in the ubiquitous diatom Skeletonema marinoi
Source: PubMed Central journal article supplement (PMC4445783; doi:10.1186/s12864-015-1574-5), 2015-05-28

DECL STAT

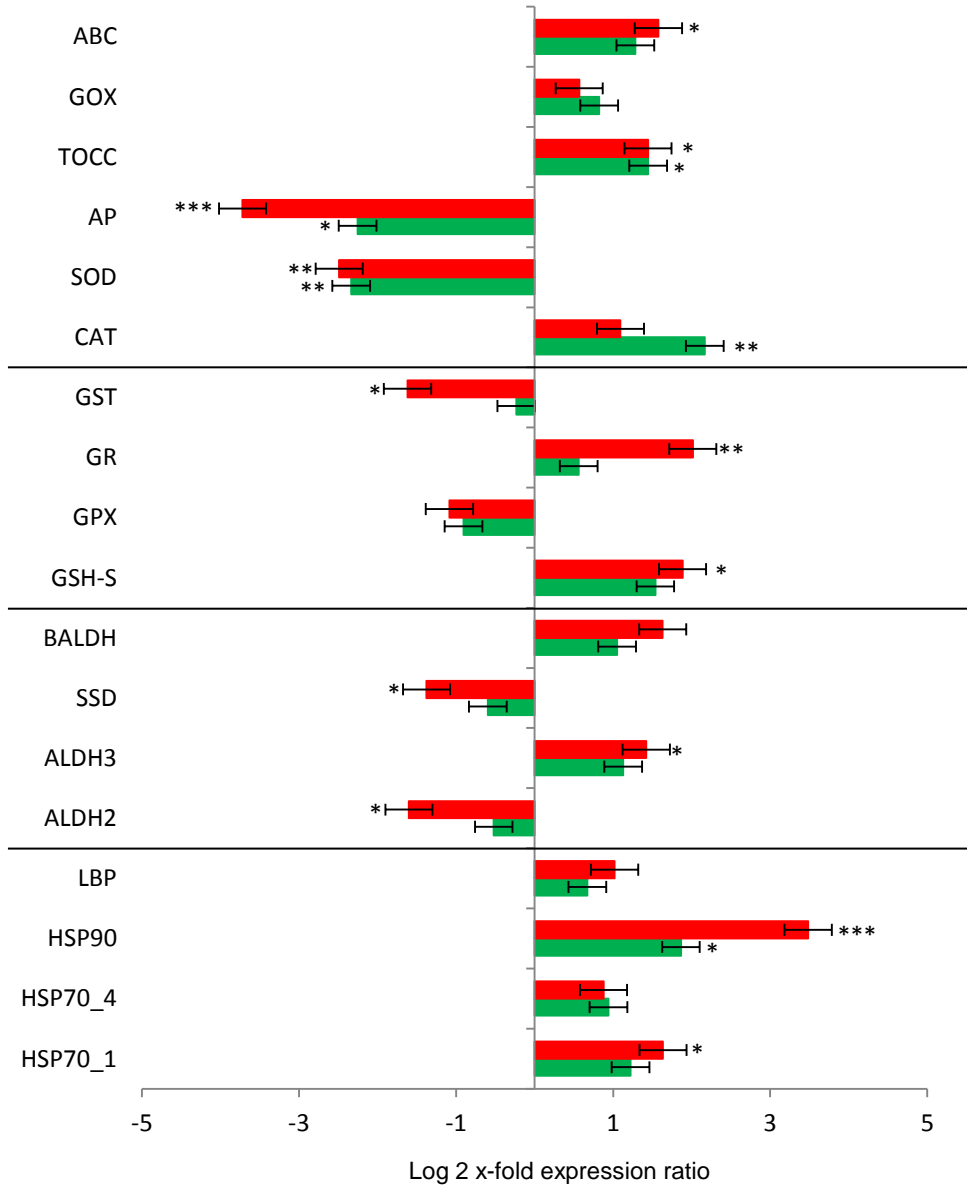

Supplement: 12864_2015_1574_MOESM2_ESM.pdf [file 12864_2015_1574_MOESM2_ESM.pdf]
